# Supplementary material for: Understanding traditional Chinese medicine anti-inflammatory herbal formulae by simulating their regulatory functions in the human arachidonic acid metabolic network
Source: Royal Society of Chemistry journal article supplement (doi:10.1039/c3mb25605g), 2013-03-15
Supplement: c3mb25605g.pdf [file c3mb25605g.pdf]

Table S1 2-D structures of 237 molecules selected from 28 Traditional Chinese Medicine

| Herb                                | Containing molecules with their ID                                                           |                                                                                              |                                                                                                |                                                                                                |
|-------------------------------------|----------------------------------------------------------------------------------------------|----------------------------------------------------------------------------------------------|------------------------------------------------------------------------------------------------|------------------------------------------------------------------------------------------------|
| <i>Paeonia albiflora</i> 白芍         | 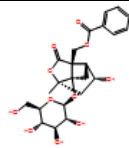<br>857     | <br>3302    | <br>8095    | <br>8116    |
|                                     | <br>9502    | <br>16524   | <br>16526   | <br>16528   |
|                                     | <br>18256   |                                                                                              |                                                                                                |                                                                                                |
| <i>Coptis chinensis</i> 黄连          | <br>2303   | <br>3174   | <br>3934    | <br>4032   |
|                                     | <br>6081  | <br>6835  | <br>7768   | <br>11851 |
|                                     | <br>12847 | <br>13374 | <br>15882 | <br>16555 |
| <i>Anemarrhena asphodeloides</i> 知母 | <br>8401  | <br>9546  | <br>10615 | <br>14926 |
|                                     | <br>15526 |                                                                                              |                                                                                                |                                                                                                |

|                                               |                                                                                              |                                                                                             |                                                                                               |                                                                                                |
|-----------------------------------------------|----------------------------------------------------------------------------------------------|---------------------------------------------------------------------------------------------|-----------------------------------------------------------------------------------------------|------------------------------------------------------------------------------------------------|
| <p><i>Phellodendron amurense</i> 黄柏<br/>柏</p> | 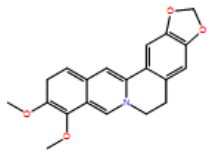<br>2303    | <br>3070   | <br>11851  | <br>12226   |
| <p><i>Isatis indigotica</i> 大青叶</p>           | <br>8589    | <br>11023  | <br>11024  | <br>15400   |
| <p><i>Lonicera japonica</i> 金银花</p>           | <br>878   | <br>2280 | <br>3551  | <br>3602  |
|                                               | <br>7521  | <br>8701 | <br>11327 | <br>13137 |
|                                               | <br>14557 |                                                                                             |                                                                                               |                                                                                                |

|                                        |                                                                                              |                                                                                             |                                                                                               |                                                                                                |
|----------------------------------------|----------------------------------------------------------------------------------------------|---------------------------------------------------------------------------------------------|-----------------------------------------------------------------------------------------------|------------------------------------------------------------------------------------------------|
| <p><i>Forsythia suspense</i> 连翘</p>    | 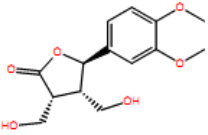<br>6029    | <br>7922   | <br>7923   | <br>13595   |
|                                        | <br>17143   | <br>18614  | <br>19540  | <br>20497   |
|                                        | <br>22720   |                                                                                             |                                                                                               |                                                                                                |
| <p><i>Schisandra chinensis</i> 五味子</p> | <br>336     | <br>1206   | <br>1207    | <br>2240    |
|                                        | <br>2241   | <br>4499 | <br>15741 | <br>17806 |
|                                        | <br>18061 |                                                                                             |                                                                                               |                                                                                                |
| <p><i>Bupleurum chinense</i> 柴胡</p>    | <br>1191  | <br>7521 | <br>12800 | <br>22337 |
| <p><i>Angelica sinensis</i> 当归</p>     | <br>1284  | <br>2600 | <br>2791 | <br>3051  |

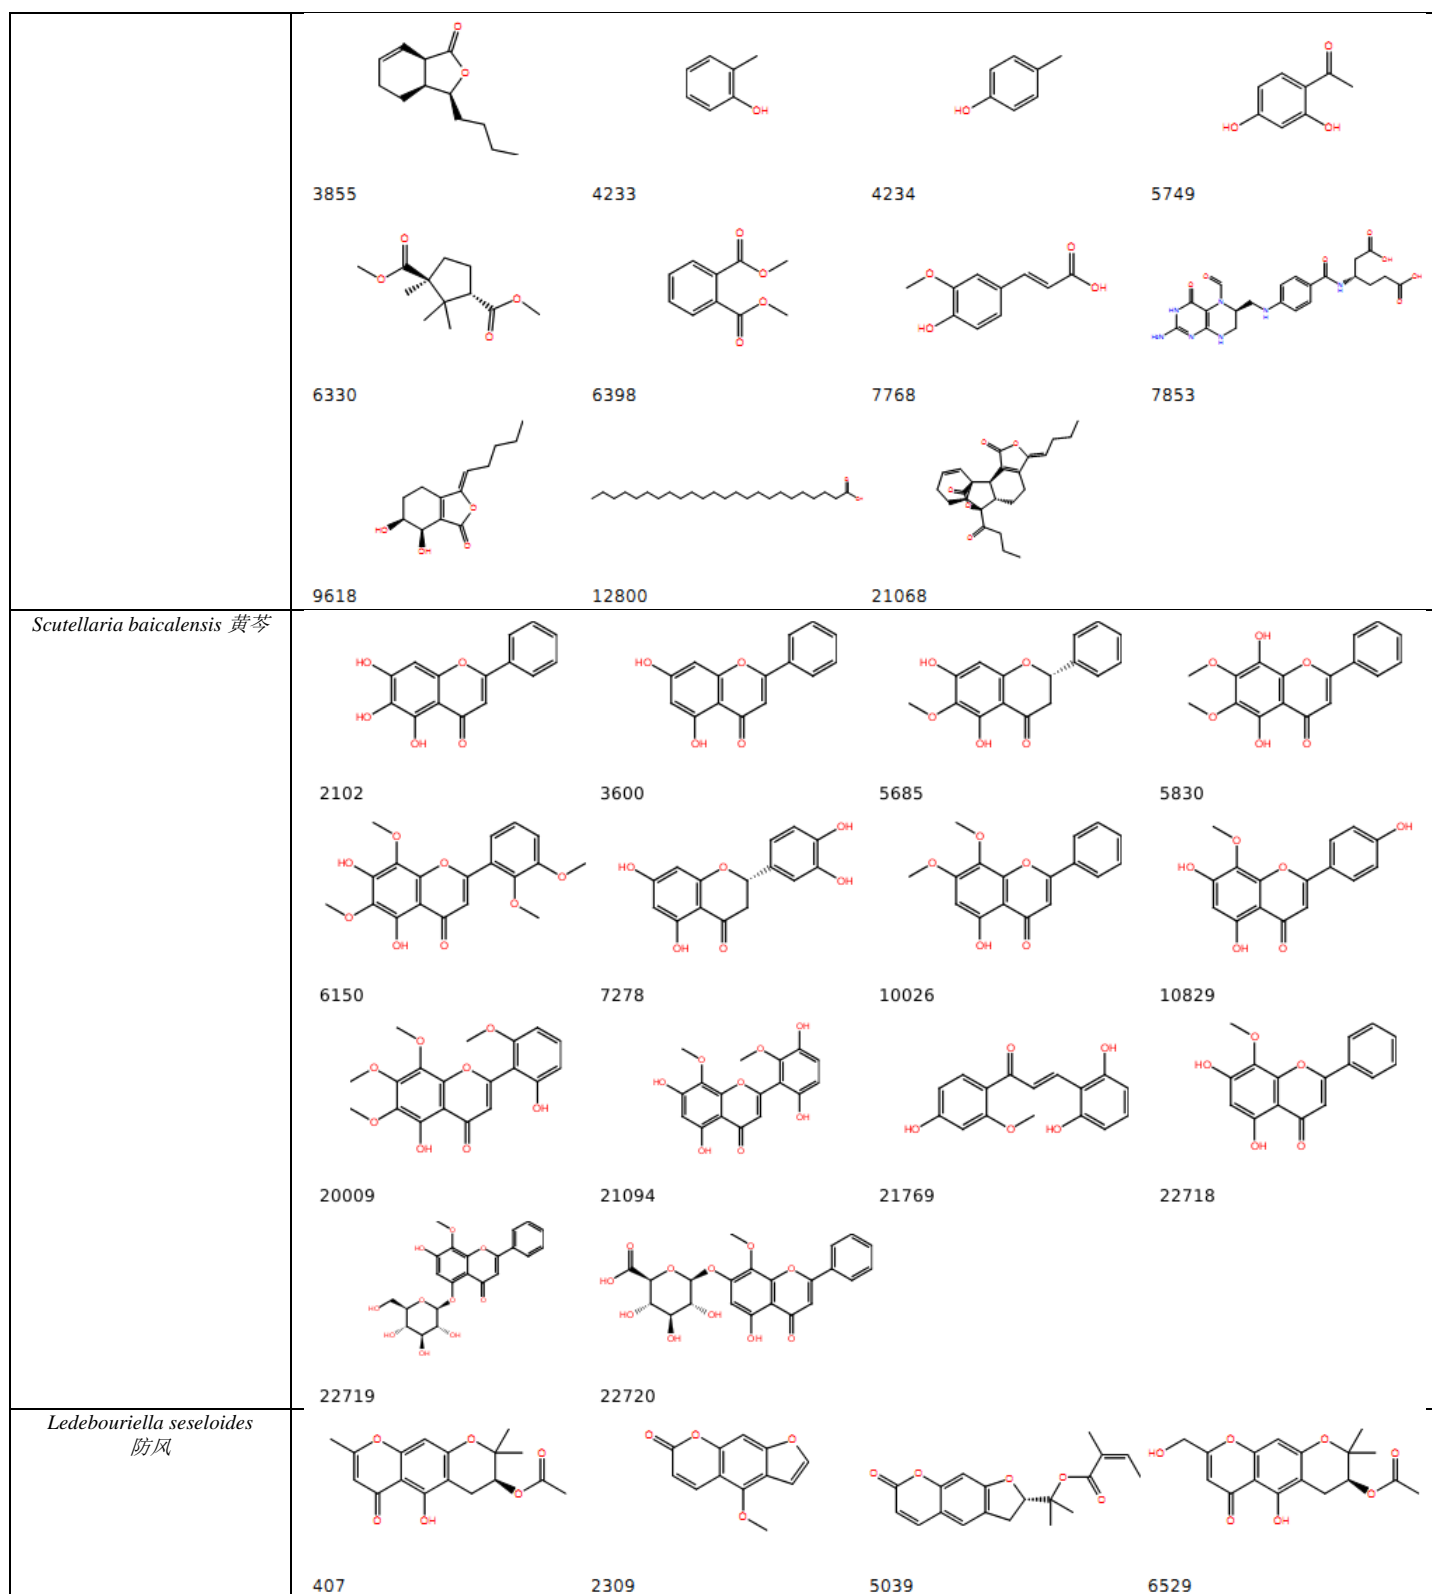

|                                 |                                                                                             |                                                                                              |                                                                                               |                                                                                                |
|---------------------------------|---------------------------------------------------------------------------------------------|----------------------------------------------------------------------------------------------|-----------------------------------------------------------------------------------------------|------------------------------------------------------------------------------------------------|
|                                 | 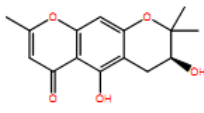<br>9205   | <br>9976    | <br>11001  | <br>12601   |
|                                 | <br>12800  | <br>14812   | <br>17077  |                                                                                                |
| <i>Houttuynia cordata</i> 鱼腥草   | <br>336    | <br>1695    | <br>3409    | <br>3551    |
|                                 | <br>5462   | <br>13474   | <br>15725   | <br>17463   |
|                                 | <br>18317 | <br>19397 | <br>19405 | <br>22615 |
| <i>Achyranthes bidentata</i> 牛膝 | <br>3615 | <br>5404  |                                                                                               |                                                                                                |
| <i>Sophora angustifolia</i> 苦参  | <br>1134 | <br>2145  | <br>4594 | <br>4948  |
|                                 | <br>7883 | <br>11222 | <br>11473 | <br>11783 |

|                                          |                                                                                              |                                                                                              |                                                                                               |                                                                                                |
|------------------------------------------|----------------------------------------------------------------------------------------------|----------------------------------------------------------------------------------------------|-----------------------------------------------------------------------------------------------|------------------------------------------------------------------------------------------------|
|                                          | 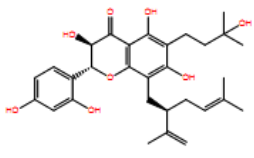<br>12280   | <br>12340   | <br>12341   | <br>12343   |
|                                          | <br>12344   | <br>12353   | <br>12371   | <br>13089   |
|                                          | <br>13462   | <br>13606   | <br>14279   | <br>15425   |
|                                          | <br>16451   | <br>22761   |                                                                                               |                                                                                                |
| <i>Acanthopanax gracilistylus</i><br>五加皮 | <br>6754   | <br>19777  |                                                                                               |                                                                                                |
| <i>Stephania tetrandra</i> 防己            | <br>3747  | <br>4459  | <br>7714  | <br>11851 |
|                                          | <br>13714 | <br>14441 | <br>14753 | <br>16332 |
|                                          | <br>20313 | <br>20314 | <br>20320 | <br>21206 |
| <i>Platycodon grandiflorum</i><br>车前子    | <br>10351 |                                                                                              |                                                                                               |                                                                                                |

|                                            |                                                                                                     |                                                                                                     |                                                                                                      |                                                                                                       |
|--------------------------------------------|-----------------------------------------------------------------------------------------------------|-----------------------------------------------------------------------------------------------------|------------------------------------------------------------------------------------------------------|-------------------------------------------------------------------------------------------------------|
| <p><i>Cimicifuga foetida</i> 升麻</p>        | 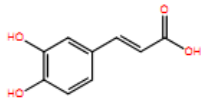<br><p>2887</p>    | <br><p>7768</p>    | <br><p>14181</p>  | <br><p>22530</p>   |
| <p><i>Prunus armeniaca</i> 杏仁</p>          | <br><p>6820</p>    |                                                                                                     |                                                                                                      |                                                                                                       |
| <p><i>Cinnamomum aromaticum</i><br/>桂枝</p> | <br><p>1263</p>    | <br><p>1264</p>    | <br><p>17869</p>  |                                                                                                       |
| <p><i>Gardenia florid</i> 栀子</p>           | <br><p>1792</p>    | <br><p>2925</p>    | <br><p>4716</p>   | <br><p>7070</p>    |
|                                            | <br><p>8227</p>  | <br><p>8230</p>  | <br><p>8273</p> |                                                                                                       |
| <p><i>Arctium lappa</i> 牛蒡子</p>            | <br><p>1621</p>  | <br><p>11236</p> | <br><p>12513</p> | <br><p>12519</p> |
|                                            | <br><p>15340</p> |                                                                                                     |                                                                                                      |                                                                                                       |

*Glycyrrhiza uralensis* 甘草

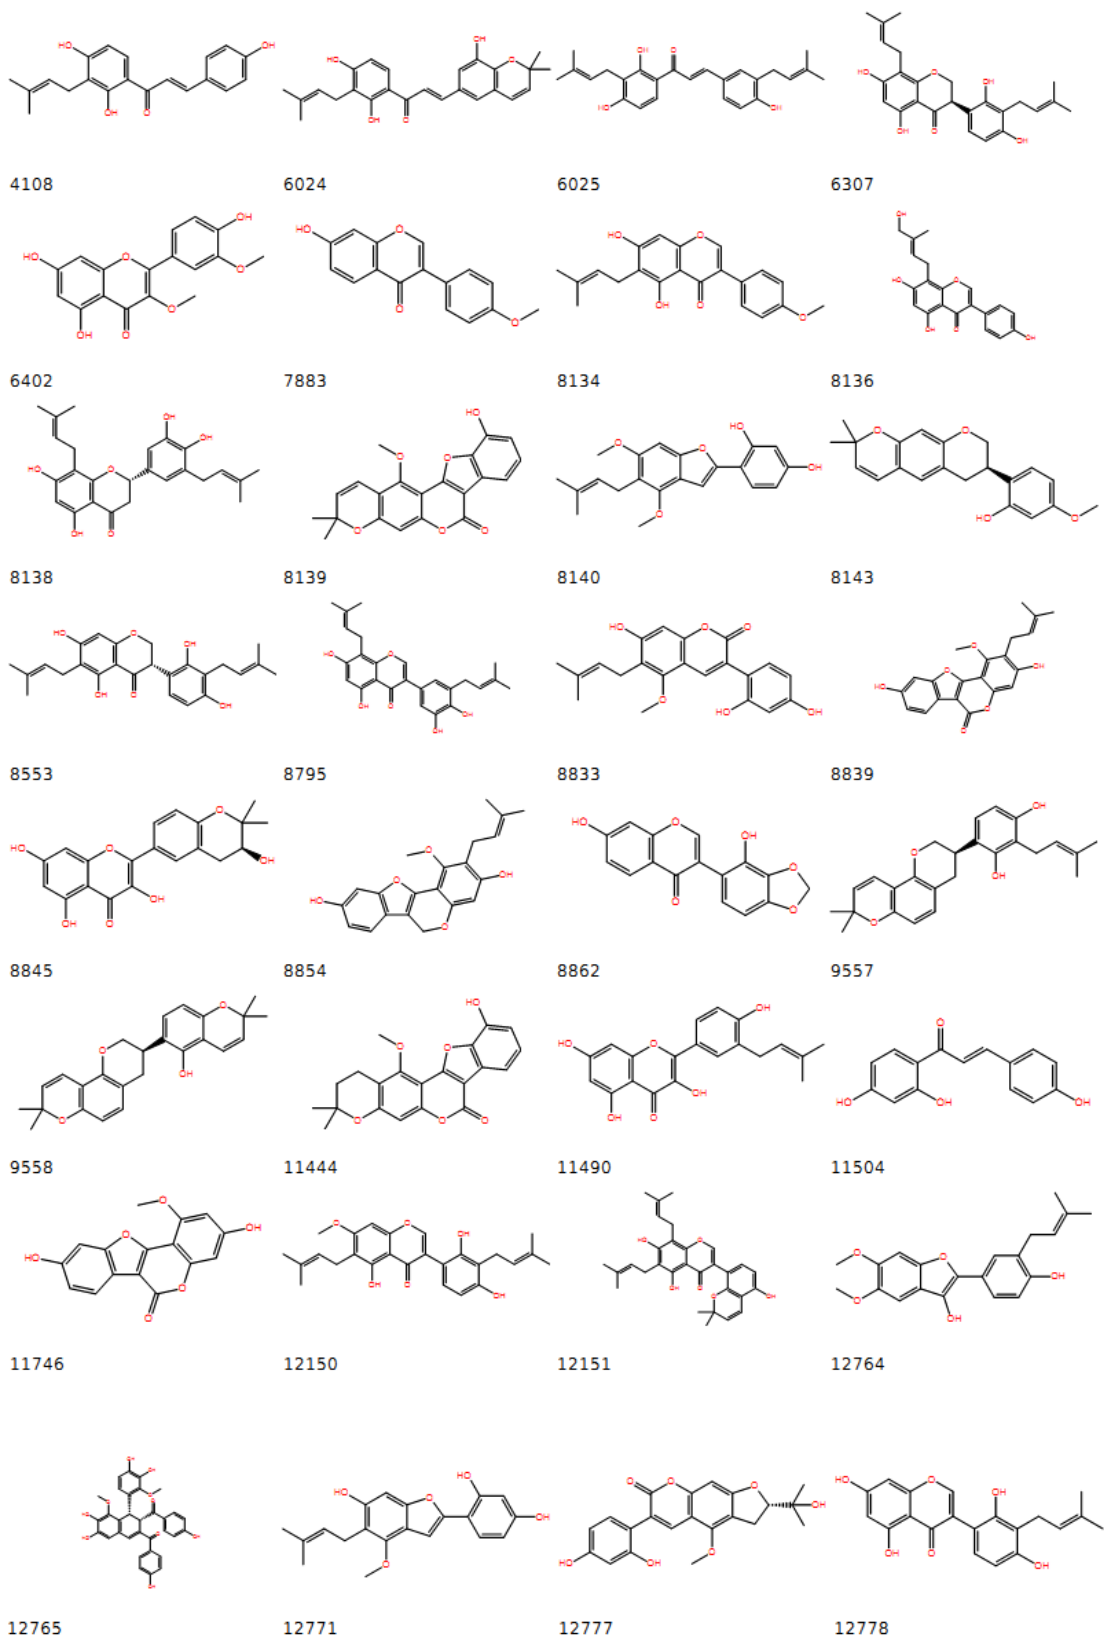



|                                       |                                                                                             |                                                                                             |                                                                                               |                                                                                              |
|---------------------------------------|---------------------------------------------------------------------------------------------|---------------------------------------------------------------------------------------------|-----------------------------------------------------------------------------------------------|----------------------------------------------------------------------------------------------|
|                                       | 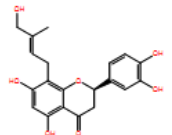<br>12780  | <br>12782  | <br>13941   | <br>14466 |
|                                       | <br>15471  | <br>17049  | <br>19884   | <br>22238 |
|                                       | <br>22239  |                                                                                             |                                                                                               |                                                                                              |
| <i>Schizonepeta tenuifolia</i><br>荆芥穗 | <br>18925  | <br>19510  |                                                                                               |                                                                                              |
| <i>Pueraria lobata</i> 葛根             | <br>4190  | <br>4604  | <br>7883   |                                                                                              |
| <i>Mentha canaensis</i> 薄荷            | <br>139  | <br>2887 | <br>12420 |                                                                                              |
| <i>Ephedra sinica</i> 麻黄              | <br>1476 | <br>6815 | <br>9421  |                                                                                              |

Table S2 AutoDock 4.0 docking scores (kcal/mol) of the 237 molecules to five enzymes in arachidonic acid network

| Herb                             | Molecule ID                         | COX-2  | PGES   | 5-LOX  | LTA4H  | COX-1  |
|----------------------------------|-------------------------------------|--------|--------|--------|--------|--------|
| <i>Paeonia albiflora</i> 白芍      | 857                                 | -10.31 | -8.33  | -11.67 | -11.12 | -9.07  |
|                                  | 3302                                | 86.61  | -10.56 | -4.5   | -12.21 | -9.04  |
|                                  | 8095                                | -7.54  | -6.73  | -7.08  | -6.49  | -6.07  |
|                                  | 8116                                | -9.16  | -9.15  | -9.87  | -11.06 | -8.43  |
|                                  | 9502                                | -11.83 | -9.95  | -10.13 | -11.27 | -9.7   |
|                                  | 16524                               | -8.69  | -7.6   | -8.64  | -8.48  | -6.95  |
|                                  | 16526                               | -6.82  | -5.81  | -6.55  | -7.27  | -7.15  |
|                                  | 16528                               | -8.48  | -7.51  | -8.38  | -9.8   | -8.06  |
| 18256                            | -8.19                               | -6.9   | -8.32  | -8.7   | -7.31  |        |
| <i>Coptis chinensis</i> 黄连       | 2303                                | -8.46  | -7.41  | -7.6   | -8.07  | -9.42  |
|                                  | 3174                                | -8.65  | -8.65  | -8.83  | -8.59  | -7.93  |
|                                  | 3934                                | -8.25  | -7.48  | -7.55  | -7.76  | -9.38  |
|                                  | 4032                                | -8.64  | -7.59  | -8.15  | -7.98  | -9.53  |
|                                  | 6081                                | -8.95  | -8.03  | -8.45  | -10.03 | -7.49  |
|                                  | 6835                                | -8.46  | -7.31  | -7.6   | -7.41  | -7.85  |
|                                  | 7768                                | -5.9   | -6.2   | -6.99  | -6.56  | -6.96  |
|                                  | 11851                               | -8.67  | -7.4   | -7.86  | -7.34  | -7.82  |
|                                  | 12847                               | -8.22  | -6.99  | -9.33  | -8.36  | -7.83  |
|                                  | 13374                               | -9.46  | -7.6   | -8.78  | -8.76  | -8.03  |
|                                  | 15882                               | -7.39  | -8.05  | -9.79  | -9.02  | -7.26  |
|                                  | 16555                               | -8.5   | -7.19  | -7.54  | -7.26  | -8.06  |
|                                  | <i>Anemarrhena asphodeloides</i> 知母 | 8401   | -9.27  | -9.97  | -12.37 | -10.31 |
| 9546                             |                                     | -7.79  | -7.08  | -7.79  | -7.43  | -8.66  |
| 10615                            |                                     | -6.23  | -6.09  | -6.76  | -6.02  | -6.5   |
| 14926                            |                                     | -7.48  | -6.6   | -7.39  | -7.01  | -8.8   |
| 15526                            |                                     | -4.66  | -3.82  | -3.93  | -4.84  | -4.78  |
| <i>Phellodendron amurense</i> 黄柏 | 2303                                | -8.46  | -7.41  | -7.6   | -8.07  | -9.42  |
|                                  | 3070                                | -4.78  | -3.98  | -5.73  | -7.54  | -4.9   |
|                                  | 11851                               | -8.67  | -7.4   | -7.86  | -7.34  | -7.82  |
|                                  | 12226                               | -5.86  | -7.92  | -9.05  | -9.9   | -7.74  |
|                                  | 13374                               | -9.46  | -7.6   | -8.78  | -8.76  | -8.03  |
|                                  | 13716                               | -8.87  | -7.16  | -8.31  | -7.93  | -6.74  |
|                                  | 15882                               | -7.39  | -8.05  | -9.79  | -9.02  | -7.26  |
|                                  | 15883                               | -6.08  | -6.65  | -11.15 | -8.14  | -7.92  |
|                                  | 15884                               | -2.36  | -7.64  | -10.76 | -8.44  | -7.42  |
|                                  | 16555                               | -8.5   | -7.19  | -7.54  | -7.26  | -8.06  |
|                                  | 17065                               | -8.53  | -6.87  | -8.17  | -9.96  | -8.4   |
| <i>Isatis indigotica</i> 大青叶     | 8589                                | -10    | -9.63  | -10.04 | -10.95 | -8.59  |
|                                  | 11023                               | -7.72  | -6.47  | -7.51  | -7.17  | -8.07  |
|                                  | 11024                               | -7.65  | -6.67  | -7.61  | -8.14  | -8.23  |
|                                  | 15400                               | -9.96  | -10.85 | -11.42 | -10.64 | -9.21  |
|                                  | 18287                               | -10.21 | -8.47  | -9.14  | -8.32  | -8.51  |
|                                  | 22060                               | -7.26  | -6.13  | -6.65  | -9.19  | -7.06  |
| <i>Lonicera japonica</i> 金银花     | 878                                 | 15.38  | -6.92  | -6.75  | -8.57  | -7.79  |
|                                  | 2280                                | -6.75  | -5.41  | -6.54  | -7.3   | -7.36  |
|                                  | 3551                                | -9.82  | -9.49  | -9.6   | -9.83  | -8.89  |
|                                  | 3602                                | -9.42  | -7.55  | -8.78  | -10.41 | -9.47  |
|                                  | 7521                                | -6.19  | -5.05  | -5.31  | -6.15  | -6.31  |

|                                   |       |        |        |        |        |        |
|-----------------------------------|-------|--------|--------|--------|--------|--------|
|                                   | 8701  | -2.7   | -7.46  | -8.74  | -9.21  | -8.16  |
|                                   | 11327 | -9.52  | -9.33  | -9.38  | -10.52 | -8.84  |
|                                   | 13137 | -9.43  | -7.75  | -8.8   | -10.63 | -9.92  |
|                                   | 14557 | -8.06  | -10.84 | -8.99  | -12.28 | -10.62 |
| <i>Forsythia suspense</i> 连翘      | 6029  | -6.87  | -6.16  | -6.64  | -7.65  | -7.89  |
|                                   | 7922  | -10.66 | -8.89  | -10.81 | -10.75 | -8.47  |
|                                   | 7923  | -6.59  | -5.74  | -6.94  | -7.66  | -7.47  |
|                                   | 13595 | -9.47  | -8.87  | -10.53 | -10.03 | -8.7   |
|                                   | 17143 | -8.06  | -7.15  | -8.69  | -8.1   | -7.08  |
|                                   | 18614 | -5.74  | -4.97  | -5.17  | -6.56  | -5.51  |
|                                   | 19540 | -5.61  | -5     | -6.03  | -6.33  | -6.27  |
|                                   | 20497 | -6.25  | -6.19  | -6.46  | -6.57  | -6.39  |
|                                   | 22720 | -10.14 | -10.36 | -10.54 | -10.01 | -9.21  |
| <i>Schisandra chinensis</i> 五味子   | 336   | -6.19  | -4.97  | -6.57  | -6.26  | -6.04  |
|                                   | 1206  | -6.79  | -4.65  | -10.6  | -6.45  | -5.17  |
|                                   | 1207  | -7.04  | -4.94  | -8.01  | -7.81  | -5.56  |
|                                   | 2240  | -7.5   | -8.14  | -9.95  | -9.18  | -6.78  |
|                                   | 2241  | -3.39  | -6.18  | -9.16  | -8.83  | -6.97  |
|                                   | 4499  | -7.06  | -5.92  | -7.38  | -8.63  | -8.27  |
|                                   | 15741 | -9.16  | -8.06  | -9.1   | -10.35 | -8.53  |
|                                   | 17806 | -8.1   | -6.89  | -7.46  | -7.04  | -6.22  |
|                                   | 18061 | -8.25  | -7.48  | -7.98  | -8     | -6.47  |
| <i>Bupleurum chinense</i> 柴胡      | 1191  | -6.97  | -5.16  | -6.61  | -7.05  | -6.83  |
|                                   | 7521  | -6.19  | -5.05  | -5.31  | -6.15  | -6.31  |
|                                   | 12800 | -7.44  | -6.04  | -7.98  | -9.66  | -5.61  |
|                                   | 22337 | -5.19  | -4.45  | -5.65  | -5.75  | -5.69  |
| <i>Angelica sinensis</i> 当归       | 1284  | -5.27  | -5.64  | -5.55  | -4.92  | -5.07  |
|                                   | 2600  | -7.93  | -8.01  | -8.15  | -7.74  | -7.65  |
|                                   | 2791  | -6.34  | -5.48  | -6     | -7.2   | -7.11  |
|                                   | 3051  | -6.18  | -6.98  | -7.23  | -5.64  | -5.72  |
|                                   | 3855  | -6.5   | -5.67  | -6.42  | -7.51  | -7.24  |
|                                   | 4233  | -5.23  | -4.2   | -4.46  | -4.98  | -5.33  |
|                                   | 4234  | -5.11  | -4.05  | -4.6   | -5.09  | -5.34  |
|                                   | 5749  | -5.81  | -5.07  | -5.46  | -6.29  | -6.06  |
|                                   | 6330  | -6.03  | -4.93  | -5.89  | -5.84  | -6.03  |
|                                   | 6398  | -5.23  | -4.54  | -5.5   | -5.73  | -5.73  |
|                                   | 7768  | -5.9   | -6.2   | -6.99  | -6.56  | -6.96  |
|                                   | 7853  | -6.34  | -7.54  | -8.24  | -8.25  | -6.01  |
|                                   | 9618  | -7.6   | -6.76  | -7.45  | -8.35  | -8.27  |
|                                   | 12800 | -7.44  | -6.04  | -7.98  | -9.66  | -5.61  |
|                                   | 21068 | -10.35 | -8.84  | -9.58  | -8.47  | -7.83  |
| <i>Scutellaria baicalensis</i> 黄芩 | 2102  | -8.53  | -7.64  | -8.44  | -10.33 | -8.87  |
|                                   | 3600  | -8.37  | -7.1   | -8.43  | -9.67  | -8.9   |
|                                   | 5685  | -8.82  | -7.46  | -8.47  | -9.77  | -8.7   |
|                                   | 5830  | -7.8   | -7.03  | -8.03  | -8.72  | -7.91  |
|                                   | 6150  | -8.07  | -7.91  | -8.06  | -8.35  | -7.86  |
|                                   | 7278  | -9.45  | -8.22  | -8.97  | -10.89 | -9.51  |
|                                   | 10026 | -8.13  | -7.43  | -8.21  | -8.99  | -7.31  |
|                                   | 10829 | -8.49  | -7.83  | -9.03  | -9.38  | -7.56  |
|                                   | 20009 | -8.62  | -7.75  | -7.54  | -8.13  | -7.26  |

|                                    |       |        |        |        |        |       |
|------------------------------------|-------|--------|--------|--------|--------|-------|
|                                    | 21094 | -7.97  | -7.24  | -7.67  | -7.7   | -6.57 |
|                                    | 21769 | -7.73  | -6.83  | -7.81  | -8.76  | -9.07 |
|                                    | 22718 | -8.12  | -7.58  | -8.19  | -9.38  | -8.06 |
|                                    | 22719 | -10.16 | -9.33  | -10.03 | -9.41  | -8.64 |
|                                    | 22720 | -10.14 | -10.36 | -10.54 | -10.01 | -9.21 |
| <i>Ledebouriella seseloides</i> 防风 | 407   | -8.14  | -7.58  | -8.66  | -9.5   | -8.91 |
|                                    | 2309  | -6.15  | -5.19  | -6.61  | -6.69  | -6.89 |
|                                    | 5039  | -9.62  | -7.74  | -8.61  | -9.76  | -7.59 |
|                                    | 6529  | -8.63  | -7.78  | -8.05  | -10.17 | -9.3  |
|                                    | 9205  | -7.87  | -7.59  | -8.55  | -9.45  | -8.8  |
|                                    | 9976  | -8.9   | -7.07  | -8.38  | -8.26  | -7.61 |
|                                    | 11001 | -7.78  | -6.38  | -7.44  | -7.89  | -6.92 |
|                                    | 12601 | -9.78  | -8.76  | -9.4   | -8.27  | -9.78 |
|                                    | 12800 | -7.44  | -6.04  | -7.98  | -9.66  | -5.61 |
|                                    | 14812 | -7.87  | -7.4   | -7.52  | -8.19  | -8.53 |
|                                    | 17077 | -7.72  | -6.64  | -7.74  | -7.5   | -7.12 |
| <i>Houttuynia cordata</i> 鱼腥草      | 336   | -6.19  | -4.97  | -6.57  | -6.26  | -6.04 |
|                                    | 1695  | -7.5   | -6.68  | -7.5   | -6.75  | -6.82 |
|                                    | 3409  | -7.94  | -7.07  | -8.03  | -6.93  | -6.37 |
|                                    | 3551  | -9.82  | -9.49  | -9.6   | -9.83  | -8.89 |
|                                    | 5462  | -8.05  | -6.48  | -7.99  | -7.84  | -6.43 |
|                                    | 13474 | 6.09   | -6.66  | -4.08  | -8.28  | -5.16 |
|                                    | 15725 | -7.9   | -7.18  | -7.53  | -7.24  | -7.34 |
|                                    | 17463 | -7.55  | -6.59  | -7.94  | -7.15  | -8.13 |
|                                    | 18317 | -9.12  | -8.37  | -9.19  | -10.68 | -8.55 |
|                                    | 19397 | -10.56 | -6.18  | -11.34 | -8.15  | -6.26 |
|                                    | 19405 | 1.48   | -6.73  | -5.31  | -10.24 | -8.01 |
|                                    | 22615 | -6.93  | -6.81  | -6.6   | -7.53  | -6.85 |
| <i>Achyranthes bidentata</i> 牛膝    | 3615  | -7.3   | -6.59  | -7.38  | -8.01  | -8.13 |
|                                    | 5404  | -6.63  | -5.22  | -6.43  | -6.65  | -5.61 |
| <i>Sophora angustifolia</i> 苦参     | 1134  | -7.32  | -5.95  | -7.45  | -9.4   | -7.1  |
|                                    | 2145  | -7.62  | -6.05  | -7.58  | -9.13  | -6.36 |
|                                    | 4594  | -6.24  | -5.26  | -6.46  | -9.03  | -6.08 |
|                                    | 4948  | -7.9   | -5.4   | -7.19  | -7.81  | -7.39 |
|                                    | 7883  | -8.01  | -6.34  | -7.96  | -8.82  | -7.58 |
|                                    | 11222 | -9.08  | -9.02  | -8.98  | -9.39  | -7.9  |
|                                    | 11473 | -6.07  | -5     | -6.11  | -8.41  | -6.15 |
|                                    | 11783 | -9.64  | -8.8   | -8.49  | -8.83  | -7.35 |
|                                    | 12280 | -9.17  | -6.59  | -10.94 | -8.92  | -9.66 |
|                                    | 12340 | -6.17  | -5.23  | -6.77  | -8.68  | -6.53 |
|                                    | 12341 | -8.86  | -7.41  | -9.73  | -8.7   | -8.07 |
|                                    | 12343 | -10.89 | -6.61  | -9.36  | -9.47  | -7.7  |
|                                    | 12344 | -11.75 | -7.13  | -8.85  | -8.47  | -7.57 |
|                                    | 12353 | -8.11  | -7.46  | -7.52  | -9.67  | -8.93 |
|                                    | 12371 | -7.79  | -6.51  | -7.26  | -7.46  | -7.62 |
|                                    | 13089 | -6.99  | -5.76  | -6.84  | -7.76  | -6.24 |
|                                    | 13462 | -7.53  | -5.89  | -7.44  | -8.53  | -7.16 |
|                                    | 13606 | -8.05  | -6.6   | -7.2   | -7.6   | -8.14 |
|                                    | 14279 | -5.96  | -4.85  | -6.45  | -7.6   | -5.71 |
|                                    | 15425 | -9.01  | -6.62  | -9.26  | -9.06  | -6.41 |

|                                       |       |        |       |        |        |       |
|---------------------------------------|-------|--------|-------|--------|--------|-------|
|                                       | 16451 | -8.39  | -6.02 | -7.66  | -8.63  | -8.12 |
|                                       | 22761 | -8.57  | -8.09 | -8.93  | -9.68  | -7.58 |
| <i>Acanthopanax gracilistylus</i> 五加皮 | 6754  | -10.06 | -9.27 | -9.32  | -8.96  | -7.41 |
|                                       | 19777 | -7.55  | -8.2  | -8.65  | -10.81 | -7.7  |
| <i>Stephania tetrandra</i> 防己         | 3747  | -8.83  | -7.68 | -8.36  | -8.01  | -6.81 |
|                                       | 4459  | -8.6   | -6.93 | -8.53  | -10.72 | -6.42 |
|                                       | 7714  | 6.99   | -5.31 | -9.23  | -8.65  | -8.56 |
|                                       | 11851 | -8.67  | -7.4  | -7.86  | -7.34  | -7.82 |
|                                       | 13714 | 17.43  | -5.96 | -11.45 | -9.55  | -7.5  |
|                                       | 14441 | 25.88  | -5.14 | -9.89  | -9.32  | -7.06 |
|                                       | 14753 | 29.06  | -4.81 | -7.56  | -8.19  | -6.92 |
|                                       | 16332 | 31.18  | -6.08 | -9.96  | -9.41  | -8.61 |
|                                       | 20313 | -7.95  | -7.99 | -8.08  | -8.3   | -8.04 |
|                                       | 20314 | 2.6    | -6.96 | -6.98  | -9.96  | -6.49 |
|                                       | 20320 | -7.76  | -6.56 | -8     | -8.66  | -7.28 |
|                                       | 21206 | 9.15   | -4.6  | -6.35  | -8.35  | -7.92 |
| <i>Platycodon grandiflorum</i> 车前子    | 10351 | -9.51  | -8.07 | -9.4   | -10.72 | -9.91 |
| <i>Cimicifuga foetida</i> 升麻          | 2887  | -6.59  | -7.03 | -7.24  | -7.02  | -7.43 |
|                                       | 7768  | -5.9   | -6.2  | -6.99  | -6.56  | -6.96 |
|                                       | 14181 | -7.04  | -5.65 | -6.37  | -7.8   | -7.55 |
|                                       | 22530 | -8.35  | -7.78 | -9.03  | -9.69  | -9.24 |
| <i>Prunus armeniaca</i> 杏仁            | 6820  | -2.05  | -8.15 | -12.76 | -10.57 | -9.11 |
| <i>Cinnamomum aromaticum</i> 桂枝       | 1263  | -7.23  | -6    | -8.97  | -7.98  | -6.44 |
|                                       | 1264  | -7.16  | -8.75 | -10.23 | -9.72  | -7.9  |
|                                       | 17869 | 12.26  | -8.16 | -10.61 | -10.92 | -7.57 |
| <i>Gardenia florida</i> 栀子            | 1792  | -7.81  | -7.26 | -7.89  | -7.21  | -6    |
|                                       | 2925  | -7.55  | -9.65 | -11.79 | -9.86  | -9.25 |
|                                       | 4716  | -9.62  | -9.06 | -9.6   | -8.97  | -8.23 |
|                                       | 7070  | -8.87  | -7.98 | -8.44  | -8.6   | -8.24 |
|                                       | 8227  | -6.05  | -5.45 | -6.92  | -6.99  | -6.48 |
|                                       | 8230  | -6.66  | -5.14 | -6.27  | -7.01  | -6.99 |
|                                       | 8273  | -6.27  | -5.83 | -6.54  | -6.99  | -6.61 |
| <i>Arctium lappa</i> 牛蒡子              | 1621  | -8.02  | -6.87 | -8.9   | -7.86  | -7.73 |
|                                       | 11236 | -8.2   | -7.56 | -8.56  | -8.51  | -7.28 |
|                                       | 12513 | -9.16  | -7.52 | -11.6  | -10.7  | -8.07 |
|                                       | 12519 | 4.13   | -5.96 | -10.46 | -9.93  | -6.12 |
|                                       | 15340 | 5.71   | -6.8  | -8.05  | -11.18 | -5.71 |
| <i>Glycyrrhiza uralensis</i> 甘草       | 4108  | -8.52  | -7.7  | -8.68  | -10.18 | -7.73 |
|                                       | 6024  | -9.3   | -8.88 | -10.1  | -11.56 | -9.18 |
|                                       | 6025  | -10.34 | -8.27 | -9.71  | -10.7  | -7.86 |
|                                       | 6307  | -7.96  | -8.79 | -9.96  | -10.88 | -9.66 |
|                                       | 6402  | -9.51  | -7.67 | -7.9   | -10.53 | -7.85 |
|                                       | 7883  | -8.01  | -6.34 | -7.96  | -8.82  | -7.58 |
|                                       | 8134  | -9.27  | -8.18 | -9.39  | -10.57 | -7.55 |
|                                       | 8136  | -9.4   | -8.13 | -9.95  | -10.87 | -8.93 |
|                                       | 8138  | -10.6  | -9.97 | -10.69 | -11.24 | -10.6 |
|                                       | 8139  | -9.57  | -8.01 | -8.79  | -8.44  | -6.88 |
|                                       | 8140  | -9.27  | -7.69 | -7.82  | -8.33  | -7.06 |
|                                       | 8143  | -7.4   | -8.12 | -8.54  | -9.37  | -8.76 |
|                                       | 8553  | -8.98  | -7.27 | -10.01 | -9.97  | -9.79 |

|                                    |        |       |        |        |        |        |
|------------------------------------|--------|-------|--------|--------|--------|--------|
| 8795                               | -10.08 | -9.24 | -10.78 | -10.2  | -10.29 |        |
| 8833                               | -9.28  | -8.43 | -9.26  | -9.92  | -8.07  |        |
| 8839                               | -9.85  | -8.2  | -8.47  | -8.71  | -7.14  |        |
| 8845                               | -8.69  | -8.74 | -9.45  | -11.05 | -8.35  |        |
| 8854                               | -9.18  | -7.58 | -7.97  | -8.09  | -7.1   |        |
| 8862                               | -8.41  | -7.5  | -8.33  | -9.12  | -8.33  |        |
| 9557                               | -8.61  | -8.59 | -10.24 | -9.47  | -8.6   |        |
| 9558                               | -6.53  | -8.91 | -8.49  | -8.92  | -9.01  |        |
| 11444                              | -9.53  | -8.07 | -8.8   | -8.49  | -7.88  |        |
| 11490                              | -9.51  | -8.75 | -9.38  | -12.09 | -8.72  |        |
| 11504                              | -7.9   | -7.12 | -8.76  | -9.6   | -8.68  |        |
| 11746                              | -7.87  | -6.99 | -7.48  | -8.75  | -8.64  |        |
| 12150                              | -9.9   | -10.3 | -9.99  | -9.9   | -9.75  |        |
| 12151                              | -7.14  | -8.37 | -12.11 | -9.91  | -9     |        |
| 12764                              | -8.13  | -7.3  | -8.34  | -9.16  | -7.03  |        |
| 12765                              | -3.47  | -7.24 | -9.63  | -12.69 | -5.67  |        |
| 12771                              | -9.13  | -7.78 | -8.06  | -8.84  | -8.01  |        |
| 12777                              | -8.84  | -9.1  | -9.39  | -9.87  | -7.58  |        |
| 12778                              | -10.05 | -9.06 | -9.22  | -9.81  | -9.17  |        |
| 12780                              | -10.21 | -9.53 | -10.23 | -10.78 | -8.79  |        |
| 12782                              | -8.33  | -7.94 | -8.44  | -9.69  | -7.54  |        |
| 13941                              | -7.89  | -8.32 | -9.25  | -8.6   | -8.12  |        |
| 14466                              | -7.94  | -7.68 | -8.74  | -8.04  | -7.45  |        |
| 15471                              | -10.89 | -8.31 | -10.78 | -9.84  | -9.28  |        |
| 17049                              | -8.77  | -7.87 | -8.83  | -8.51  | -9.28  |        |
| 19884                              | -10.12 | -9.74 | -10.13 | -11.13 | -9.28  |        |
| 22238                              | -10.79 | -8.59 | -9.11  | -9.96  | -8.01  |        |
| 22239                              | -10.38 | -9.32 | -9.55  | -10.33 | -9.15  |        |
| <i>Schizonepeta tenuifolia</i> 荆芥穗 | 18925  | -8.54 | -7.94  | -8.47  | -9.4   | -7.64  |
|                                    | 19510  | -8.16 | -10.55 | -11.39 | -11.44 | -10.96 |
| <i>Pueraria lobata</i> 葛根          | 4190   | -7.71 | -6.77  | -7.96  | -9.14  | -8.41  |
|                                    | 4604   | -7.88 | -7.1   | -7.76  | -9.03  | -7.49  |
|                                    | 7883   | -8.01 | -6.34  | -7.96  | -8.82  | -7.58  |
| <i>Mentha canaensis</i> 薄荷         | 139    | -6.44 | -5.61  | -7.02  | -7.39  | -6.84  |
|                                    | 2887   | -6.59 | -7.03  | -7.24  | -7.02  | -7.43  |
|                                    | 12420  | -8.88 | -9.25  | -9.77  | -10.23 | -8.43  |
| <i>Ephedra sinica</i> 麻黄           | 1476   | -8.88 | -7.52  | -8.69  | -10.07 | -9.12  |
|                                    | 6815   | -5.35 | -5     | -5.9   | -8.32  | -5.21  |
|                                    | 9421   | -9.04 | -8.35  | -9.2   | -10.26 | -8.84  |
